# Supplementary material for: Psychobehavioral Profiles to Assist Tailoring of Interventions for Patients With Hypertension: Latent Profile Analysis
Source: PubMed Central journal article supplement (PMC5970280; doi:10.2196/jmir.8757), 2018-05-11
Supplement: jmir_v20i5e149_app1.pdf [file jmir_v20i5e149_app1.pdf]

Online Supplement Table 1

**Supplementary Table 1: Background Characteristics, Health Behavior and Cardiovascular Risk Factors for Total Sample at Baseline**

| Baseline Variables                               | <b>Total Sample: N = 264</b> |                   |
|--------------------------------------------------|------------------------------|-------------------|
| <b>Sociodemographic Features</b>                 | <b>n, M</b>                  | <b>(%), 95%CI</b> |
| Sex: % female                                    | 154                          | (58)              |
| Age: years                                       | 57.6                         | 56, 59            |
| Body Mass Index                                  | 31.1                         | 30, 32            |
| Years Education                                  | 16.1                         | 15.8, 16          |
| Self-Reported Income*                            | 7.2                          | 7, 8              |
| <b>Health Behavior</b>                           |                              |                   |
| Current Smoking                                  | 24                           | (9.1)             |
| 4-Day Step Count <sup>†</sup>                    | 7828                         | 7430, 8226        |
| Daily Fruit-Vegetable Servings <sup>‡</sup>      | 8.1                          | 7.4, 8.8          |
| <b>CVD Risk Factors</b>                          |                              |                   |
| Systolic blood pressure: mmHg                    | 141.0                        | 140, 142          |
| Diastolic blood pressure: mmHg                   | 87.3                         | 86, 88            |
| Pulse Pressure: mmHg                             | 53.7                         | 52, 55            |
| Total Cholesterol: mg/dl                         | 195.7                        | 191, 201          |
| Non-HDL-Cholesterol: mg/dl                       | 142.3                        | 137, 147          |
| Framingham Index:<br>10-Year Absolute CVD Risk % | 15.6                         | 14, 17            |

\* Self-reported income per family (\$CAD), 1 = ≤ \$19,000, 10 ≥ \$100,000.

<sup>†</sup> Step count recorded on a tri-axial accelerometer, LifeSource/A&D XL-18CN Activity Monitor

<sup>‡</sup> Fruit and vegetable servings measured by Diet History Questionnaire [21].
